# Supplementary material for: Geometrical determinants of cerebral artery fenestration for cerebral infarction
Source: PeerJ. 2025 Jan 21;13:e18774. doi: 10.7717/peerj.18774 (PMC11758911; doi:10.7717/peerj.18774)
Supplement: Supplemental Information 2 [file peerj-13-18774-s002.xlsx]

## Sheet: BA Group(n=60)
	number	φ1	φ2	fAL (mm)	fAR (mm)	fAT (mm)	Df (mm)	Dfi (mm)	TIL	TIR	LPL (mm)	LPR (mm)	RH	RL/D
BA Control Group(n=23)	1	55.9285	58.3978	0.7651	1.3674	2.1325	4.507	27.5211	1.2188	1.0692	5.4932	4.8191	0.1638	0.4732
	2	121.993	109.502	1.7184	0.7817	2.5001	5.2548	22.7992	1.2367	1.0563	6.4985	5.5508	0.2305	0.4758
	3	97.2838	93.6652	0.5553	3.6077	4.163	7.8153	21.1377	1.0122	1.5611	7.9108	12.2001	0.3697	0.5327
	4	96.1725	98.0516	0.4848	2.3477	2.8325	4.9517	29.063	1.0235	1.4561	5.0681	7.2101	0.1704	0.572
	5	96.0239	77.851	0.2978	2.8581	3.1559	4.8323	26.2808	1.0105	1.3116	4.8829	6.3382	0.1839	0.6531
	6	100.301	99.1125	0.4881	1.6057	2.0938	4.3245	25.3972	1.0316	1.313	4.461	5.6781	0.1703	0.4842
	7	45.8932	121.625	0.7671	1.6381	2.4052	5.7591	25.4373	1.044	1.2083	6.0127	6.9584	0.2264	0.4176
	8	81.7876	159.338	2.1707	1.0996	3.2703	7.5905	16.1703	1.0681	1.1866	8.1072	9.0066	0.4694	0.4308
	9	130.295	83.1805	0.8281	1.7085	2.5366	5.2702	22.5696	1.0738	1.2471	5.6593	6.5727	0.2335	0.4813
	10	56.4619	57.0533	1.4625	2.1847	3.6472	8.6564	28.6601	1.0694	1.1589	9.2567	10.0323	0.302	0.4213
	11	89.9587	101.835	0.5094	2.8946	3.404	5.5383	27.4407	1.0222	1.5439	5.6614	8.5508	0.2018	0.6146
	12	110.874	112.102	2.4484	1.0641	3.5125	6.8643	22.3637	1.2718	1.0596	8.73	7.2736	0.3069	0.5117
	13	106.084	88.955	1.4338	1.0401	2.4739	4.8601	32.2721	1.2223	1.1192	5.9407	5.4396	0.1506	0.509
	14	107.079	100.763	0.8025	4.5752	5.3777	11.2131	35.5398	1.0285	1.4091	11.5332	15.8004	0.3155	0.4796
	15	95.087	98.6561	1.9275	0.9015	2.829	5.608	27.4243	1.2837	1.0607	7.199	5.9482	0.2045	0.5045
	16	118.963	97.3399	1.5437	3.2869	4.8306	10.8297	33.0557	1.0633	1.2245	11.5154	13.2613	0.3276	0.4461
	17	118.087	95.973	1.8902	2.808	4.6982	8.5723	27.7415	1.1381	1.2379	9.7564	10.6113	0.309	0.5481
	18	88.1844	96.6499	5.0524	6.0934	11.1458	20.7608	36.0672	1.1519	1.231	23.9151	25.5564	0.5756	0.5369
	19	97.0894	96.1799	1.1384	1.6133	2.7517	4.8311	29.5056	1.1288	1.23	5.4534	5.9421	0.1637	0.5696
	20	99.3229	137.205	1.9565	2.1425	4.099	7.2272	26.3837	1.1704	1.1921	8.4584	8.6155	0.2739	0.5672
	21	92.1953	105.003	2.3748	1.1921	3.5669	7.2291	30.9034	1.2522	1.0654	9.0522	7.7021	0.2339	0.4934
	22	98.8246	99.2165	0.6577	1.9412	2.5989	5.4106	20.0195	1.0368	1.3012	5.6099	7.0403	0.2703	0.4803
	23	99.7246	96.4152	3.3276	1.3643	4.6919	8.7217	27.9468	1.328	1.0582	11.5821	9.2294	0.3121	0.538
BA Infarction Group(n=37)	1	81.9784	84.9702	1.7225	0.4868	2.2093	4.3953	29.7318	1.3391	1.0318	5.8859	4.5352	0.1478	0.5027
	2	63.2826	80.465	2.8193	0.2362	3.0555	5.5792	30.3484	1.4801	1.0047	8.258	5.6053	0.1838	0.5477
	3	66.4572	76.7617	2.0618	0.8961	2.9579	5.4485	18.6791	1.2857	1.072	7.0053	5.841	0.2917	0.5429
	4	91.7665	64.7579	1.4585	1.0068	2.4653	6.8902	26.1053	1.1214	1.1406	7.7264	7.8587	0.2639	0.3578
	5	90.3253	91.3515	2.5408	0.0844	2.6252	4.0058	27.8011	1.8639	1.0015	7.4663	4.0116	0.1441	0.6554
	6	99.4381	96.7249	3.1149	1.4725	4.5874	6.0695	27.8011	1.5342	1.1306	9.3117	10.4423	0.2183	0.7558
	7	93.7309	97.7836	1.3394	0.614	1.9534	4.149	27.8011	1.2481	1.0575	5.1785	4.3876	0.1492	0.4708
	8	48.2408	58.7545	1.8348	0.6572	2.492	5.5253	29.2961	1.2436	1.0384	6.8712	5.7372	0.1886	0.451
	9	74.79	56.45	1.3434	1.8999	3.2433	6.2042	22.8172	1.166	1.2505	7.2342	7.7581	0.2719	0.5228
	10	62.5358	70.8193	1.1611	1.3714	2.5325	4.6697	27.2569	1.1789	1.2197	5.505	5.6956	0.1713	0.5423
	11	117.203	116.35	1.2975	1.6311	2.9286	5.9372	30.6063	1.107	1.1835	6.5727	7.0269	0.194	0.4933
	12	102.293	101.647	1.0763	1.9908	3.0671	6.5436	28.8763	1.0636	1.1913	6.9596	7.7954	0.2266	0.4687
	13	83.8472	87.1611	0.6993	2.7822	3.4815	6.1318	28.0986	1.0312	1.4303	6.3229	8.7704	0.2182	0.5678
	14	86.998	74.7078	2.1397	1.0699	3.2096	5.5595	19.6476	1.309	1.0847	7.2772	6.0305	0.283	0.5773
	15	59.4689	40.8188	1.7713	0.9051	2.6764	5.1771	25.1735	1.2404	1.084	6.4216	5.6119	0.2057	0.517
	16	89.2215	117.912	2.1013	1.7282	3.8295	9.7999	32.5795	1.2203	1.4673	11.959	14.3795	0.3008	0.3908
	17	84.6094	78.0961	2.4545	0.6536	3.1081	5.4563	22.9306	1.3988	1.0445	7.6324	5.6992	0.2379	0.5696
	18	72.1459	90.5382	1.9221	0.8167	2.7388	5.0384	26.8188	1.3383	1.0608	6.7427	5.3448	0.1879	0.5436
	19	87.5171	72.7113	1.4083	1.479	2.8873	5.213	22.4523	1.1768	1.1805	6.1347	6.1537	0.2322	0.5539
	20	82.632	102.188	2.048	2.1139	4.1619	11.3069	28.4794	1.1021	1.104	12.461	12.4829	0.397	0.3681
	21	83.2368	98.4498	2.8773	0.2743	3.1516	4.4003	31.5314	1.9407	1.0098	8.5396	4.4435	0.1396	0.7162
	22	81.6265	86.8101	3.8375	2.9486	6.7861	18.3169	47.8064	1.1842	1.0816	21.6904	19.8112	0.3831	0.3705
	23	84.5151	77.9471	2.8716	3.3846	6.2562	12.0579	41.9759	1.1782	1.1816	14.2062	14.2471	0.2873	0.5188
	24	100.724	124.792	2.0384	0.8032	2.8416	5.586	23.4842	1.3133	1.0509	7.3362	5.8703	0.2379	0.5087
	25	98.5072	96.2241	4.1713	2.1596	6.3309	14.9133	26.4573	1.2483	1.0684	18.6158	15.9335	0.5637	0.4245
	26	87.3852	82.1786	0.8648	1.9408	2.8056	5.455	26.4638	1.0578	1.3023	5.7703	7.1038	0.2061	0.5143
	27	100.757	108.708	0.8728	1.8089	2.6817	5.0937	23.631	1.0714	1.2643	5.4574	6.4401	0.2156	0.5265
	28	89.2221	80.719	3.0442	0.4472	3.4914	4.5679	28.6125	1.8154	1.0225	8.2924	4.6707	0.1596	0.7643
	29	77.6586	71.6022	2.1831	1.658	3.8411	8.4905	26.367	1.1501	1.0881	9.7649	9.2383	0.322	0.4524
	30	55.1343	81.5947	1.3343	1.8021	3.1364	6.0503	23.1708	1.1071	1.1883	6.6984	7.1895	0.2611	0.5184
	31	77.2108	90.0138	1.2089	2.2765	3.4854	5.8619	24.8804	1.0951	1.3235	6.4192	7.7582	0.2356	0.5946
	32	59.4822	80.5349	1.3783	1.7166	3.0949	5.8578	28.9013	1.1266	1.1768	6.5996	6.8933	0.2027	0.5283
	33	115.861	121.567	1.9533	0.9807	2.934	5.9321	23.7461	1.2364	1.0665	7.3342	6.3266	0.2498	0.4946
	34	82.8979	83.6387	4.3597	0.7696	0.7696	8.6142	31.513	1.5142	1.023	13.0439	8.8121	0.2734	0.0893
	35	92.8474	82.6549	1.9622	1.2189	3.1811	5.4645	27.4001	1.2842	1.1204	7.0177	6.1225	0.1994	0.5821
	36	88.9526	80.4197	1.1799	1.4538	2.6337	4.8456	24.3644	1.1408	1.193	5.5277	5.7808	0.1989	0.5435
	37	95.825	93.9859	3.5337	0.0889	3.6226	6.2771	30.2846	1.6132	1.0012	10.1263	6.2848	0.2073	0.5771

## Sheet: Non_BA Group(n=29)
	number	φ1	φ2	fAL (mm)	fAR (mm)	fAT (mm)	Df (mm)	Dfi (mm)	TIL	TIR	LPL (mm)	LPR (mm)	RH	RL/D
Non_BA Control Group(n=11)	1	89.6876	93.9949	1.4693	3.1616	4.6309	9.1646	17.6829	1.0707	1.3089	9.8122	11.9956	0.5183	0.5053
	2	89.7915	98.5475	2.1862	1.2609	3.4471	3.6665	12.5533	1.6475	1.2574	6.0406	4.6101	0.2921	0.9402
	3	98.2172	92.6303	0.8347	4.0507	4.8854	8.6788	8.6788	1.0473	1.5638	9.0895	13.5721	1	0.5629
	4	92.3832	97.5516	2.4029	2.5216	4.9245	7.6001	14.7231	1.2865	1.3203	9.7772	10.0346	0.5162	0.648
	5	95.3491	94.7606	1.0278	1.7624	2.7902	8.0326	16.1473	1.0605	1.2867	8.5187	10.3359	0.4975	0.3474
	6	101.624	85.1928	1.9911	3.6937	5.6848	9.0194	19.176	1.152	1.4123	10.39	12.7383	0.4703	0.6303
	7	108.327	89.6804	0.9597	1.6237	2.5834	3.5941	6.404	1.1615	1.4133	4.1745	5.0795	0.5612	0.7188
	8	91.0554	86.7656	0.9181	2.8843	3.8024	8.2197	31.7533	1.0309	1.4056	8.4738	11.5533	0.2589	0.4626
	9	54.8284	71.4229	0.5725	1.988	2.5605	5.4511	36.5052	1.0313	1.2839	5.622	6.9988	0.1493	0.4697
	10	89.0775	96.0178	5.4232	9.1594	14.5826	22.4077	35.8764	1.2733	1.3497	28.5317	30.2433	0.6246	0.6508
	11	84.6367	92.6785	1.6981	2.4847	4.1828	8.2354	31.0884	0.3388	1.2345	2.7905	10.1668	0.2649	0.5079
Non_BA Infarction Group(n=18)	1	86.9144	78.2895	2.6943	1.6189	4.3132	5.8133	17.138	1.586	1.2068	9.2202	7.0158	0.3392	0.7419
	2	69.0371	70.8075	2.6822	0.7237	3.4059	9.0643	16.5523	1.2766	1.055	11.5711	9.5625	0.5476	0.3758
	3	85.7999	99.5617	1.2086	2.518	2.518	8.2815	19.771	1.0656	1.2693	8.8246	10.5118	0.4189	0.3041
	4	98.2361	84.6313	4.9926	1.4618	6.4544	8.1136	17.0674	1.7785	1.1418	14.43	9.2642	0.4754	0.7955
	5	82.2658	90.8139	2.1499	2.0159	4.1658	8.686	15.6824	1.186	1.1594	10.3017	10.0704	0.5539	0.4796
	6	92.0872	89.0116	2.0926	1.5659	3.6585	5.3731	16.2831	1.3187	1.1987	7.0856	6.4409	0.33	0.6809
	7	97.9791	87.5705	3.789	3.9363	7.7253	10.4462	17.4488	1.3992	1.3607	14.6166	14.2147	0.5987	0.7395
	8	120.771	91.664	2.6972	1.5901	4.2873	7.846	15.2144	1.3483	1.1001	10.5789	8.6316	0.5157	0.5464
	9	78.5298	93.8501	3.5816	1.8523	5.4339	5.297	17.413	1.9338	1.2784	10.2434	6.7719	0.3042	1.0259
	10	76.604	89.4472	2.0107	1.6224	3.6331	4.544	17.413	1.4496	1.2669	6.587	5.7569	0.261	0.7995
	11	82.2041	81.3758	2.3773	1.8968	4.2741	8.6555	14.9185	1.1962	1.1134	10.3533	9.6372	0.5802	0.4938
	12	120.185	93.0831	2.1668	1.1728	3.3396	4.0364	4.0364	1.6441	1.2134	6.6362	4.8978	1	0.8274
	13	78.3553	80.9311	2.2084	1.5496	3.758	9.458	34.3013	1.1617	1.0662	10.987	10.0836	0.2757	0.3973
	14	92.6376	101.083	5.0912	1.8058	6.897	14.3724	43.1564	1.5272	1.0623	21.9501	15.2676	0.333	0.4799
	15	105.234	94.3818	2.334	0.8212	3.1552	5.0445	28.2182	1.4359	1.0701	7.2433	5.3979	0.1788	0.6255
	16	88.9237	86.1413	2.3006	2.9572	5.2578	11.2593	25.7619	1.1126	1.2071	12.527	13.5907	0.4371	0.467
	17	85.4005	96.7508	3.5314	3.2485	6.7799	13.1095	34.6837	1.1836	1.1596	15.5169	15.2014	0.378	0.5172
	18	85.8727	106.845	1.1725	2.6736	3.8461	7.428	31.4665	1.0602	1.274	7.8753	9.4632	0.2361	0.5178
